# Supplementary material for: A human MMTV-like betaretrovirus linked to breast cancer has been present in humans at least since the copper age
Source: publisher site journal article supplement (doi:10.18632/aging.103780), 2020-07-31
Supplement: Supplementary file [file aging-v12i16-103780-supplementary-material-SD1.pdf]

## SUPPLEMENTARY FIGURES

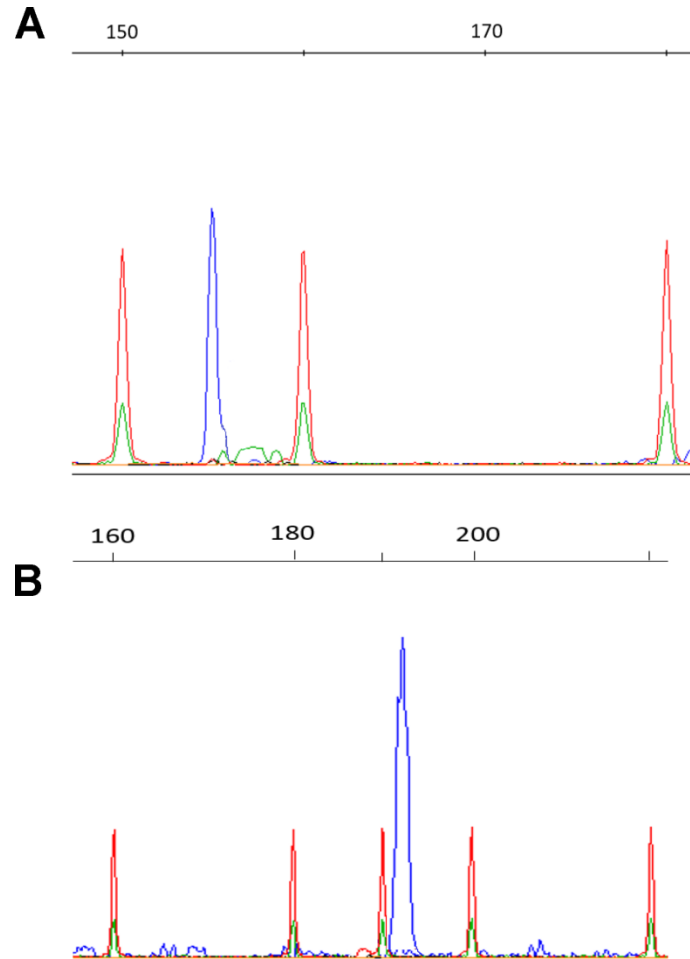

**Supplementary Figure 1. Electropherograms produced by capillary gel electrophoresis of amplified DNA products ENV1 and ENV2. After nested PCR the final PCR product measures 155bp for ENV1 (A) and 191bp for ENV2 (B).**

```

>MMTV_
CCAGATCGCCTTTAAGAAGGACGCCTTCTGGGA-----
GGGAGACGAGTCTGCTCCTCCACGGTGGTTGCC-
TTGCGCCTTCCCTGACCAGGGGGTGAGTTTTTCTCCAAAAGGGGCCCTT-----
-----
GGGTTACTTTGGGATTTCTCCCTCCCTCGCCTAGTGTAGATCAGTCAGATCAGATTAAG-----
-----
CAAAAAGAATCTATTTGGAAATTATACTCCCCGTGCAATAAAGAGGTTTCATCGATGGTATGAAGCAGGATGGG
TAGAACCTACTTGGTTCTGGGAAAATTCTCCTAAGGATCCCAATGATAGAGATTTCTACTGCACTAGTCCCC----
CATACAGAATTGTTTCGCTTAGTCGCAGCCTCAAGACATCTTA-----
-----
-----
-----
TTCTCAAAAAGGCCAGGATTTCAAGAACATGAGATGATTCCTACATCTGCCTGTGTTACTTACCCTTATGCCATA
TTATTAGGATTACCTCAGTTAATAGATAT---AGAGAAAAGAGGATCTA--
CTTTTCATATTTCTGTTCTTCTTGTAGATTGAC-----
TAATTGTTTAGACTCTTCTGCCTACGACTATGCAGCGATCATAGTCAAGAGGCCGCCATATGTGCTGCTACCTG
TAGATATTGGTGATGAACCATGGTTTGTGATTCTGCCATTCAAACCTTTAGGTATGCCA-----
-----CAGATTTAATTGAGCTAAGCGATTTCGTCGCA-----
GCCATTATCCTGGGCATATC-TGCTTTGATTGCTATTACTTCTCT---TTGCTG-----
TAGCTACTACTGCCTTAGTTAAGGAGATGCAAACCTGCTACGTTTGTAAATAATCTTCATAGGAATGTTACAT--
-----
TAGCCTTATCTGAACAACGGATAATAGATTTAAAATTAGAAGCTAGACTTAATGCTTTAGAAGAAGTAGTTTTA
GAGTTG-----
GGACAAGATGTGGCCAAATTTAAAGACCAGAATGTCCACTAGGTGTGTCGCAAATTATGAC--
TTTATCTGCGTTACAC-----CTTTACCCTATAATGCTACTGAGAAC---
TGGGAAAGAACCAGGGCTCATTTATTGGGCATTTGGAATGATAATGAGATTTTCATATAACATACAGGAGTTAAC
CAA-----CCTGATTAGTGATA---TGAGCAAACAACAT-----
ATTGATGCACTGGACCTTAGTGGCTTGGC-TCAGTCTTTTGCCA--ATGGAGTGAAGGCTTTA-----
AATCCATTAGATTGGACAC--AATATT-----
TCATTTTTATAGGTGTTGGAGCCCTGC
>HMTV
CCAGATCGCCTTTAAGAAGGACGCCTTCTGGGA-----
GGGAGACGAGTCTGCTCCTCCACGGTGGTTGCC-
TTGCGCCTTCCCTGACCAGGGGGTGAGTTTTTCTCCAAAAGGGGCCCTT-----
-----
GGGTTACTTTGGGATTTCTCCCTCCCTCGCCTAGTGTAGATCAGTCAGATCAGATTAAGAA-----
-----
CAAAAAGGATCTATTTGGAAATTATACTCCCCGTGCAATAAAGAGGTTTCATCGATGGTATGAAGCAGGATGGG
TAGAACCTACTTGGTTCTGGGAAAATTCTCCTAAGATCCCAATGATAGAGATTTTACTGCTCTAGTTCCC----
CATACAGAATTGTTTCGCTTAGTTCGCAGCCTCAAGACATCTTA-----
-----
-----
-----
TTCTCAAAAAGGCCAGGATTTCAAGAACGTGAGATGATTCCTACATCTGCCTGTGTTACTTACCCTTATGCCATA
TTATTAGGATTACCTCAGCTAATAGATAT---AGAGAAAAGAGGATCTA--
CTTTTCATATTTCTGTTCTTCTTGTAGATTGAC-----
TAATTGTTTAGATTCTTCTGTCTACGACTATGCAGCGATCATAGTCAAGAGCCGCCATATGTGGTGCTACCTG
TAGATATTGGTGATGAACCATGGTTTGTGATTCTGCCATTCAAACCTTTAGGTATGCCA-----
-----CAGATTTAATTGAGGTGAGCGATTTCGTCGGT-----
GCCATTATTGTGGGCATATA-TGCTTTAATTGGTATTATCACTTCTCT---TTGCTG-----
TAGGTACTACTGCCTTAGTTAAGGAGATGCAAACCTGCTACGTTTGTAAATAATCTTCATAGACATGTTACAT--
-----
TAGCCTTATCTGAACAAAGAATAATAGACTTTAAATTGAAAGTTAGACTTAATGCTTTAGAAGAAGTAGTTTTA
GAGTTG-----
GGACAAGATGTGGCCAACTTAAAGACCAGAATGTCCACTAGGTGTGTCGCAAATTATGAT--
TTTATCTGTGTCACAC-----CTTTGCCATATAATGCTTCTGAGAGC---
TGGGAAAGAACCAGAGCTCATTTATTGGGCATTTGGAATGACAATGAGATTTTCATATAACATACAGGAGTTAAC
CAA-----TCTGATTAGTGATA---TGAGCAAACAACAT-----
ATTGACGCACTGGACCTCAGTGGCTTGGC-TCAGTCTTTTGCCA--ATGGAGTAAAGGCTTTA-----
AATCCATTGGATTAGACAC--AATATT-----
TCATTTTTATAGGAGTTGGAGCCCTGC

```

Supplementary Figure 2. Fasta nucleotide alignment of the identified MMTV-like env amplicons with human endogenous betaretroviruses and representative animal exogenous betaretroviruses (MMTV, murine mammary tumour virus; JSRV, Jaasiekte Sheep Retrovirus; MPMV, Mason-Pfizer Monkey Virus).
